# Supplementary material for: Toxicity to, oviposition and population growth impairments of Callosobruchus maculatus exposed to clove and cinnamon essential oils
Source: PubMed Central journal article supplement (PMC6239305; doi:10.1371/journal.pone.0207618), 2018-11-16
Supplement: pone.0207618.s001.pdf [file pone.0207618.s001.pdf]

| Cumulated emergence |         |         |         |         |          |         |         |         |         |
|---------------------|---------|---------|---------|---------|----------|---------|---------|---------|---------|
| Clove               |         |         |         |         | Cinnamon |         |         |         |         |
| days                | control | LD20    | LD40    | LD60    | days     | control | LD20    | LD40    | LD60    |
| 0                   | 0       | 0       | 0       | 0       | 0        | 0       | 0       | 0       | 0       |
| 2                   | 0,1306  | 0       | 0       | 0       | 2        | 6,481   | 0,1333  | 0       | 0       |
| 4                   | 20,161  | 0,3727  | 0,4545  | 0       | 4        | 44,9726 | 11,8008 | 8,1294  | 0,7692  |
| 6                   | 52,6852 | 6,8141  | 5,7576  | 0,7143  | 6        | 74,0883 | 34,1053 | 31,0092 | 6,6612  |
| 8                   | 76,5525 | 25,467  | 31,123  | 22,3221 | 8        | 94,0813 | 73,1434 | 63,5628 | 45,9662 |
| 10                  | 91,4659 | 50,9034 | 57,0472 | 52,5928 | 10       | 98,3631 | 86,2657 | 80,0771 | 70,882  |
| 12                  | 97,1225 | 74,2978 | 80,1578 | 83,0753 | 12       | 99,5631 | 98,7122 | 94,2193 | 90,7429 |
| 14                  | 98,9141 | 85,495  | 89,869  | 89,8445 | 14       | 99,8795 | 99,3228 | 97,2312 | 97,7204 |
| 16                  | 99,622  | 97,6094 | 98,8636 | 98,0388 | 16       | 100     | 100     | 98,8299 | 98,5714 |
| 18                  | 99,8694 | 98,6563 | 98,8636 | 100     | 18       | 100     | 100     | 100     | 100     |
| 20                  | 99,9691 | 99,388  | 100     | 100     |          |         |         |         |         |
| 22                  | 100     | 100     | 100     | 100     |          |         |         |         |         |

| Daily emergence |         |         |      |         |      |        |      |        |
|-----------------|---------|---------|------|---------|------|--------|------|--------|
| Cinnamon        |         |         |      |         |      |        |      |        |
| days            | control | SE      | LD20 | SE      | LD40 | SE     | LD60 | SE     |
| 0               | 0       | 0       | 0    | 0       | 0    | 0      | 0    | 0      |
| 2               | 32,6    | 6,3922  | 0,4  | 0,4     | 0    | 0      | 0    | 0      |
| 4               | 190,25  | 7,3512  | 23   | 18,8918 | 10   | 5,3666 | 0,2  | 0,2    |
| 6               | 146,2   | 10,5707 | 27,8 | 16,7404 | 23,8 | 9,0907 | 1,8  | 1,2    |
| 8               | 99,6    | 5,8873  | 24,4 | 10,6892 | 25,4 | 6,2338 | 10,6 | 4,7074 |
| 10              | 21,4    | 2,2271  | 10,6 | 5,4918  | 11,6 | 2,5417 | 3,6  | 0,8124 |

|              |         |         |      |        |      |        |      |        |
|--------------|---------|---------|------|--------|------|--------|------|--------|
| 12           | 6       | 1,1402  | 5,8  | 1,6248 | 7    | 1,4142 | 2,8  | 1,0677 |
| 14           | 1,6     | 0,6782  | 0,4  | 0,2449 | 3    | 1,3038 | 1,4  | 0,4    |
| 16           | 0,6     | 0,4     | 0,6  | 0,2449 | 1,4  | 0,5099 | 0,4  | 0,4    |
| 18           | 0       | 0       | 0    | 0      | 0,6  | 0,2449 | 0,2  | 0,2    |
| <b>Clove</b> |         |         |      |        |      |        |      |        |
| days         | control | SE      | LD20 | SE     | LD40 | SE     | LD60 | SE     |
| 0            | 0       | 0       | 0    | 0      | 0    | 0      | 0    | 0      |
| 2            | 0,6     | 0,2449  | 0    | 0      | 0    | 0      | 0    | 0      |
| 4            | 88      | 15,8032 | 0,6  | 0,6    | 0,4  | 0,4    | 0    | 0      |
| 6            | 135,8   | 19,9885 | 9,6  | 8,6348 | 4,6  | 4,3543 | 0,2  | 0,2    |
| 8            | 100     | 15,3003 | 17   | 8,2341 | 10   | 2,6458 | 5,4  | 2,1119 |
| 10           | 64,8    | 12,2368 | 18,8 | 3,8131 | 14,4 | 4,8021 | 7,4  | 2,7313 |
| 12           | 24,6    | 5,5009  | 16,4 | 2,6944 | 11,6 | 2,9086 | 8    | 2,9665 |
| 14           | 7,4     | 1,7205  | 7,6  | 2,502  | 4,4  | 1,1662 | 1,6  | 0,9274 |
| 16           | 3       | 0,8367  | 8    | 1,0488 | 4,2  | 1,3565 | 1,8  | 1,1136 |
| 18           | 1,2     | 0,5831  | 0,8  | 0,2    | 0    | 0      | 0,6  | 0,2449 |
| 20           | 0,4     | 0,2449  | 0,6  | 0,6    | 0,4  | 0,2449 | 0    | 0      |
| 22           | 0,2     | 0,2     | 0,6  | 0,4    | 0    | 0      | 0    | 0      |

### Oviposition

| Cinnamon    |     |      | Clove       |     |      |
|-------------|-----|------|-------------|-----|------|
| Combination | Rep | Eggs | Combination | Rep | Eggs |
| MT + FT     | 1   | 30   | TM + TF     | 1   | 2    |
| MT + FT     | 2   | 29   | TM + TF     | 2   | 37   |
| MT + FT     | 3   | 0    | TM + TF     | 3   | 0    |

|          |    |    |
|----------|----|----|
| MT + FT  | 4  | 30 |
| MT + FT  | 5  | 31 |
| MT + FT  | 6  | 47 |
| MT + FT  | 7  | 36 |
| MT + FT  | 8  | 0  |
| MT + FT  | 9  | 0  |
| MT + FT  | 10 | 29 |
| MT + FT  | 11 | 37 |
| MT + FT  | 12 | 0  |
| MT + FT  | 13 | 1  |
| MT + FT  | 14 | 0  |
| MT + FT  | 15 | 1  |
| MT + FT  | 16 | 33 |
| MT + FT  | 17 | 50 |
| MT + FT  | 18 | 0  |
| MT + FT  | 19 | 3  |
| MT + FT  | 20 | 13 |
| MT + FT  | 21 | 30 |
| MT + FT  | 22 | 31 |
| MT + FT  | 23 | 46 |
| MT + FT  | 24 | 3  |
| MT + FT  | 25 | 13 |
| MT + FnT | 1  | 60 |
| MT + FnT | 2  | 69 |
| MT + FnT | 3  | 0  |
| MT + FnT | 4  | 51 |
| MT + FnT | 5  | 57 |
| MT + FnT | 6  | 0  |

|          |    |    |
|----------|----|----|
| TM + TF  | 4  | 55 |
| TM + TF  | 5  | 3  |
| TM + TF  | 6  | 0  |
| TM + TF  | 7  | 0  |
| TM + TF  | 8  | 36 |
| TM + TF  | 9  | 3  |
| TM + TF  | 10 | 8  |
| TM + TF  | 11 | 17 |
| TM + TF  | 12 | 50 |
| TM + TF  | 13 | 23 |
| TM + TF  | 14 | 29 |
| TM + TF  | 15 | 2  |
| TM + TF  | 16 | 5  |
| TM + TF  | 17 | 58 |
| TM + TF  | 18 | 20 |
| TM + TF  | 19 | 32 |
| TM + TF  | 20 | 0  |
| MT + FnT | 1  | 28 |
| MT + FnT | 2  | 46 |
| MT + FnT | 3  | 38 |
| MT + FnT | 4  | 74 |
| MT + FnT | 5  | 51 |
| MT + FnT | 6  | 79 |
| MT + FnT | 7  | 43 |
| MT + FnT | 8  | 34 |
| MT + FnT | 9  | 57 |
| MT + FnT | 10 | 50 |
| MT + FnT | 11 | 91 |

|          |    |    |          |    |    |
|----------|----|----|----------|----|----|
| MT + FnT | 7  | 0  | MT + FnT | 12 | 57 |
| MT + FnT | 8  | 59 | MT + FnT | 13 | 57 |
| MT + FnT | 9  | 0  | MT + FnT | 14 | 58 |
| MT + FnT | 10 | 42 | MT + FnT | 15 | 82 |
| MT + FnT | 11 | 0  | MT + FnT | 16 | 0  |
| MT + FnT | 12 | 57 | MT + FnT | 17 | 45 |
| MT + FnT | 13 | 42 | MT + FnT | 18 | 51 |
| MT + FnT | 14 | 1  | MT + FnT | 19 | 63 |
| MT + FnT | 15 | 0  | MT + FnT | 20 | 55 |
| MT + FnT | 16 | 46 | MnT + FT | 1  | 23 |
| MT + FnT | 17 | 64 | MnT + FT | 2  | 16 |
| MT + FnT | 18 | 69 | MnT + FT | 3  | 50 |
| MT + FnT | 19 | 41 | MnT + FT | 4  | 0  |
| MT + FnT | 20 | 0  | MnT + FT | 5  | 17 |
| MT + FnT | 21 | 65 | MnT + FT | 6  | 27 |
| MT + FnT | 23 | 58 | MnT + FT | 7  | 38 |
| MT + FnT | 24 | 55 | MnT + FT | 8  | 22 |
| MT + FnT | 25 | 0  | MnT + FT | 9  | 6  |
| MnT + FT | 1  | 0  | MnT + FT | 10 | 2  |
| MnT + FT | 2  | 2  | MnT + FT | 11 | 0  |
| MnT + FT | 3  | 10 | MnT + FT | 12 | 0  |
| MnT + FT | 4  | 6  | MnT + FT | 13 | 32 |
| MnT + FT | 5  | 0  | MnT + FT | 14 | 0  |
| MnT + FT | 6  | 27 | MnT + FT | 15 | 48 |
| MnT + FT | 7  | 6  | MnT + FT | 16 | 36 |
| MnT + FT | 8  | 0  | MnT + FT | 17 | 17 |
| MnT + FT | 9  | 0  | MnT + FT | 18 | 0  |
| MnT + FT | 10 | 17 | MnT + FT | 19 | 0  |

|          |    |    |
|----------|----|----|
| MnT + FT | 11 | 2  |
| MnT + FT | 12 | 0  |
| MnT + FT | 13 | 16 |
| MnT + FT | 14 | 20 |
| MnT + FT | 15 | 0  |
| MnT + FT | 16 | 5  |
| MnT + FT | 17 | 6  |
| MnT + FT | 18 | 10 |
| MnT + FT | 19 | 9  |
| MnT + FT | 20 | 3  |
| MnT + FT | 21 | 10 |
| MnT + FT | 22 | 33 |
| MnT + FT | 23 | 5  |
| MnT + FT | 24 | 0  |
| MnT + FT | 25 | 8  |
| Control  | 1  | 67 |
| Control  | 2  | 0  |
| Control  | 3  | 60 |
| Control  | 4  | 33 |
| Control  | 5  | 66 |
| Control  | 6  | 0  |
| Control  | 7  | 66 |
| Control  | 8  | 58 |
| Control  | 9  | 0  |
| Control  | 10 | 41 |
| Control  | 11 | 57 |
| Control  | 12 | 54 |
| Control  | 13 | 53 |

|          |    |    |
|----------|----|----|
| MnT + FT | 20 | 24 |
| Control  | 1  | 67 |
| Control  | 2  | 0  |
| Control  | 3  | 60 |
| Control  | 4  | 33 |
| Control  | 5  | 66 |
| Control  | 6  | 0  |
| Control  | 7  | 66 |
| Control  | 8  | 58 |
| Control  | 9  | 0  |
| Control  | 10 | 41 |
| Control  | 11 | 57 |
| Control  | 12 | 54 |
| Control  | 13 | 53 |
| Control  | 14 | 56 |
| Control  | 15 | 0  |
| Control  | 16 | 0  |
| Control  | 17 | 44 |
| Control  | 18 | 52 |
| Control  | 19 | 68 |
| Control  | 20 | 62 |
| Control  | 21 | 73 |
| Control  | 22 | 35 |
| Control  | 23 | 28 |
| Control  | 24 | 27 |
| Control  | 25 | 61 |
| Control  | 26 | 0  |
| Control  | 27 | 57 |

|         |    |    |         |    |    |
|---------|----|----|---------|----|----|
| Control | 14 | 56 | Control | 28 | 0  |
| Control | 15 | 0  | Control | 29 | 55 |
| Control | 16 | 0  | Control | 30 | 48 |
| Control | 17 | 44 | Control | 31 | 0  |
| Control | 18 | 52 | Control | 32 | 70 |
| Control | 19 | 68 | Control | 33 | 52 |
| Control | 20 | 62 | Control | 34 | 0  |
| Control | 21 | 73 | Control | 35 | 67 |
| Control | 22 | 35 | Control | 36 | 50 |
| Control | 23 | 28 | Control | 37 | 3  |
| Control | 24 | 27 | Control | 38 | 61 |
| Control | 25 | 61 | Control | 39 | 55 |
| Control | 26 | 0  | Control | 40 | 39 |
| Control | 27 | 57 | Control | 41 | 67 |
| Control | 28 | 0  | Control | 42 | 0  |
| Control | 29 | 55 | Control | 43 | 99 |
| Control | 30 | 48 | Control | 44 | 66 |
| Control | 31 | 0  | Control | 45 | 65 |
| Control | 32 | 70 |         |    |    |
| Control | 33 | 52 |         |    |    |
| Control | 34 | 0  |         |    |    |
| Control | 35 | 67 |         |    |    |
| Control | 36 | 50 |         |    |    |
| Control | 37 | 3  |         |    |    |
| Control | 38 | 61 |         |    |    |
| Control | 39 | 55 |         |    |    |
| Control | 40 | 39 |         |    |    |
| Control | 41 | 67 |         |    |    |

|         |    |    |
|---------|----|----|
| Control | 42 | 0  |
| Control | 43 | 99 |
| Control | 44 | 66 |
| Control | 45 | 65 |

Instantaneous rate of population growth & bean-mass losses

clove

Cinnamon

|         | Concentrations | Ri           | Mass losse  |
|---------|----------------|--------------|-------------|
| Control | 0              | 0,067603081  | 16,68333667 |
| Control | 0              | 0,069139791  | 17,36       |
| Control | 0              | 0,077258089  | 25,19968051 |
| Control | 0              | 0,052878803  | 7,088658147 |
| Control | 0              | 0,065722468  | 16,41046117 |
| LC20    | 48,6           | 0,031355266  | 7,655993432 |
| LC20    | 48,6           | 0,046348269  | 5,677728908 |
| LC20    | 48,6           | 0,014840653  | 1,238266427 |
| LC20    | 48,6           | 0,024780924  | 2,200440088 |
| LC20    | 48,6           | 0,023273755  | 1,675643327 |
| LC40    | 67,6           | 0,02248002   | 2,176517572 |
| LC40    | 67,6           | 0,02653161   | 2,66        |
| LC40    | 67,6           | 0,00405159   | 1,537847014 |
| LC40    | 67,6           | -0,003611532 | 0,719712115 |
| LC40    | 67,6           | 0,032924545  | 3,312712034 |
| LC60    | 90,2           | 0,021656881  | 2,415651827 |
| LC60    | 90,2           | 0,007477161  | 1,818545164 |

|         | Concentrations | Ri       | Mass losse  |
|---------|----------------|----------|-------------|
| Control | 0              | 0,073567 | 17,38870034 |
| Control | 0              | 0,074997 | 19,46442846 |
| Control | 0              | 0,075043 | 20,72342126 |
| Control | 0              | 0,074293 | 19,25689173 |
| Control | 0              | 0,076344 | 21,89562088 |
| LC20    | 106,2          | -0,03224 | 3,151805306 |
| LC20    | 106,2          | 0,023526 | 4,757145713 |
| LC20    | 106,2          | 0,00424  | 3,80629733  |
| LC20    | 106,2          | 0,032528 | 5,358928214 |
| LC20    | 106,2          | 0,062978 | 11,83160415 |
| LC40    | 123            | 0,045254 | 6,549520767 |
| LC40    | 123            | 0,042618 | 6,549520767 |
| LC40    | 123            | 0,013669 | 4,05027933  |
| LC40    | 123            | 0,034456 | 5,472338726 |
| LC40    | 123            | 0,005189 | 3,776978417 |
| LC60    | 139,4          | -0,00829 | 3,367204622 |
| LC60    | 139,4          | 0,006101 | 3,628389155 |

|      |       |              |             |
|------|-------|--------------|-------------|
| LC60 | 90,2  | -0,017744615 | 1,518784972 |
| LC60 | 90,2  | -0,011351681 | 1,28        |
| LC60 | 90,2  | 0,003105821  | 1,539692062 |
| LC80 | 125,8 | -0,066571828 | 0,819672131 |
| LC80 | 125,8 | -0,066571828 | 0,719568259 |
| LC80 | 125,8 | -0,066571828 | 0,777511962 |
| LC80 | 125,8 | -0,030806541 | 0,959808038 |
| LC80 | 125,8 | -0,066571828 | 0,619504396 |

|      |       |          |             |
|------|-------|----------|-------------|
| LC60 | 139,4 | -0,00519 | 3,765690377 |
| LC60 | 139,4 | -0,05355 | 3,038784486 |
| LC60 | 139,4 | 0,01987  | 4,169992019 |
| LC80 | 161,4 | -0,05355 | 2,96694544  |
| LC80 | 161,4 | 0        | 3,227734608 |
| LC80 | 161,4 | 0,01093  | 3,9         |
| LC80 | 161,4 | -0,01002 | 3,195078389 |
| LC80 | 161,4 | -0,04412 | 2,955271565 |
