# Supplementary material for: Toxicity to, oviposition and population growth impairments of Callosobruchus maculatus exposed to clove and cinnamon essential oils
Source: PubMed Central journal article supplement (PMC6239305; doi:10.1371/journal.pone.0207618), 2018-11-16
Supplement: pone.0207618.s002.pdf [file pone.0207618.s002.pdf]

**S1 Table.** Summary of the non-linear regression analyses (increase rate  $r_i$  and bean mass losses) of the curves shown in Figures 1 and 2.

| Parameters evaluated                | Oil             | Model                                | Estimated parameters ( $\pm$ SD)        |                    |                    | $df_{\text{error}}$ | $F$   | $P$   | $R^2$ |
|-------------------------------------|-----------------|--------------------------------------|-----------------------------------------|--------------------|--------------------|---------------------|-------|-------|-------|
|                                     |                 |                                      | $a$                                     | $b$                | $y_0$              |                     |       |       |       |
| Increase rate ( $r_i$ )<br>(Fig. 1) | <i>Clove</i>    | $y = y_0 + a \cdot x$                | -0.001 ( $-10^{-3} - 5 \cdot 10^{-4}$ ) | -                  | 0.1 (0.04 – 0.11)  | 4                   | 54.1  | 0.005 | 0.95  |
|                                     | <i>Cinnamon</i> | $y = y_0 + a \cdot x$                | -0.001 ( $-10^{-3} - 2 \cdot 10^{-4}$ ) | -                  | 0.1 (0.04 – 0.12)  | 4                   | 30.1  | 0.01  | 0.91  |
| Mass losses<br>(Fig. 2)             | <i>Clove</i>    | $y = y_0 + a \cdot \exp(-b \cdot x)$ | 14.7 (13.1 – 16.3)                      | 0.33 (0.02 – 0.04) | 0.7 (-0.5 – 1.9)   | 4                   | 110.4 | 0.009 | 0.99  |
|                                     | <i>Cinnamon</i> | $y = y_0 + a \cdot x$                | -0.08 (-0.09 - -0.06)                   | -                  | 15.0 (12.6 – 17.5) | 4                   | 147.9 | 0.001 | 0.98  |
