# Supplementary material for: Toxicity to, oviposition and population growth impairments of Callosobruchus maculatus exposed to clove and cinnamon essential oils
Source: PubMed Central journal article supplement (PMC6239305; doi:10.1371/journal.pone.0207618), 2018-11-16
Supplement: pone.0207618.s003.pdf [file pone.0207618.s003.pdf]

**S2 Table.** Summary of the non-linear regression analyses (daily emergence) of the curves shown in Fig 3.

| Essential oil                 | Model                                       | Dose ( $\mu\text{Lkg}^{-1}$ ) | Estimated parameters ( $\pm\text{SD}$ ) |                   |                    | $df_{\text{error}}$ | F     | P       | $R^2$ |
|-------------------------------|---------------------------------------------|-------------------------------|-----------------------------------------|-------------------|--------------------|---------------------|-------|---------|-------|
|                               |                                             |                               | a                                       | b                 | $x_0$              |                     |       |         |       |
| <i>Clove</i><br>(Fig. 1 A)    | $y = a \cdot \exp(0.5 \cdot ((x-x_0)/b)^2)$ | Control                       | 133.1 (111.4 - 154.8) a                 | 2.5 (2.1 - 3.0)   | 6.7 (6.2 - 7.1)    | 11                  | 89.7  | <0.0001 | 0.95  |
|                               |                                             | 48.60                         | 19.3 (16.24 - 22.4) b                   | 3.3 (2.7 - 3.9)   | 10.1 (9.5 - 10.8)  | 11                  | 76.9  | <0.0001 | 0.94  |
|                               |                                             | 67.60                         | 14.1 (12.32- 15.9) c                    | 2.8 - (2.4 - 3.2) | 10.3 (9.9 - 10.7)  | 11                  | 140.7 | <0.0001 | 0.97  |
|                               |                                             | 90.20                         | 8.6 (6.9 - 10.3) d                      | 2.3 - (1.8 - 2.8) | 10.6 (10.1 - 11.1) | 11                  | 63.6  | <0.0001 | 0.93  |
| <i>Cinnamon</i><br>(Fig. 1 B) | $y = a \cdot \exp(0.5 \cdot ((x-x_0)/b)^2)$ | Control                       | 186.7 (142.4 - 230.1) a                 | 2.1 (1.6 - 2.7)   | 5.2 (4.7 - 5.8)    | 9                   | 46.6  | <0.0001 | 0.94  |
|                               |                                             | 106.20                        | 29.1 (23.9 - 36.1) b                    | 2.5 (1.9 - 3.1)   | 6.5 (5.9 - 7.0)    | 9                   | 57.2  | <0.0001 | 0.94  |
|                               |                                             | 123.00                        | 26.6 (22.4 - 30.7) b                    | 2.4 (1.9 - 2.8)   | 7.3 (6.8 - 7.7)    | 9                   | 91.9  | <0.0001 | 0.96  |
|                               |                                             | 139.40                        | 10.8 (7.8 - 13.7) c                     | 1.2 (0.8 - 1.6)   | 8.3 (7.7 - 8.8)    | 9                   | 30.1  | 0.0003  | 0.90  |
