# Supplementary material for: Toxicity to, oviposition and population growth impairments of Callosobruchus maculatus exposed to clove and cinnamon essential oils
Source: PubMed Central journal article supplement (PMC6239305; doi:10.1371/journal.pone.0207618), 2018-11-16
Supplement: pone.0207618.s004.pdf [file pone.0207618.s004.pdf]

**S3 Table.** Summary of the non-linear regression analyses (cumulated emergence) of the curves shown in Fig 4.

| Oil                           | Model                          | Dose<br>( $\mu\text{Lkg}^{-1}$ ) | Estimated parameters ( $\pm\text{SD}$ ) |                    |                     | $df_{\text{error}}$ | $F$    | $P$     | $R^2$ |
|-------------------------------|--------------------------------|----------------------------------|-----------------------------------------|--------------------|---------------------|---------------------|--------|---------|-------|
|                               |                                |                                  | $a$                                     | $b$                | $x_0$               |                     |        |         |       |
| <i>Clove</i><br>(Fig. 2 A)    | $y = a/(1 + \exp(-(x-x_0)/b))$ | Control                          | 99.2 (96.8 - 101.6) a                   | 1.5 (1.2 - 1.7) a  | 6.0 (5.8 - 6.3) a   | 11                  | 1402.8 | <0.0001 | 0.99  |
|                               |                                | 48.60                            | 99.4 (96.7 - 102.2) a                   | 1.8 (1.6 - 2.0) a  | 10.0 (9.8 - 10.3) b | 11                  | 2271.2 | <0.0001 | 0.99  |
|                               |                                | 67.60                            | 99.3 (96.4 - 102.2) a                   | 1.6 (1.4 - 1.9) a  | 9.6 (9.3 - 9.8) b   | 11                  | 1766.3 | <0.0001 | 0.99  |
|                               |                                | 90.20                            | 98.1 (96.2 - 101.7) a                   | 1.4 (1.1 - 1.6) a  | 9.8 (9.6 - 10.1) b  | 11                  | 1846.5 | <0.0001 | 0.99  |
| <i>Cinnamon</i><br>(Fig. 2 B) | $y = a/(1 + \exp(-(x-x_0)/b))$ | Control                          | 99.5 (96.3 - 102.7) a                   | 1.2 (1.0 - 1.5) ab | 4.5 (4.2 - 4.8) a   | 9                   | 763.1  | <0.0001 | 0.99  |
|                               |                                | 106.20                           | 99.5 (96.5 - 102.5) a                   | 1.4 (1.1 - 1.6) ab | 6.8 (6.6 - 7.1) b   | 9                   | 1467.2 | <0.0001 | 0.99  |
|                               |                                | 123.00                           | 98.5 (95.1 - 101.9) a                   | 1.5 (1.3 - 1.8) a  | 7.3 (7.0 - 7.6) b   | 9                   | 1293.5 | <0.0001 | 0.99  |
|                               |                                | 139.40                           | 98.6 (93.3 - 103.8) a                   | 1.3 (1.0 - 1.7) ab | 8.5 (8.1 - 8.9) c   | 9                   | 656.9  | <0.0001 | 0.99  |
